# Supplementary material for: H atom scattering from W(110): A benchmark for molecular dynamics with electronic friction.
Source: Royal Society of Chemistry journal article supplement (doi:10.1039/d2cp01850k), 2022-01-01

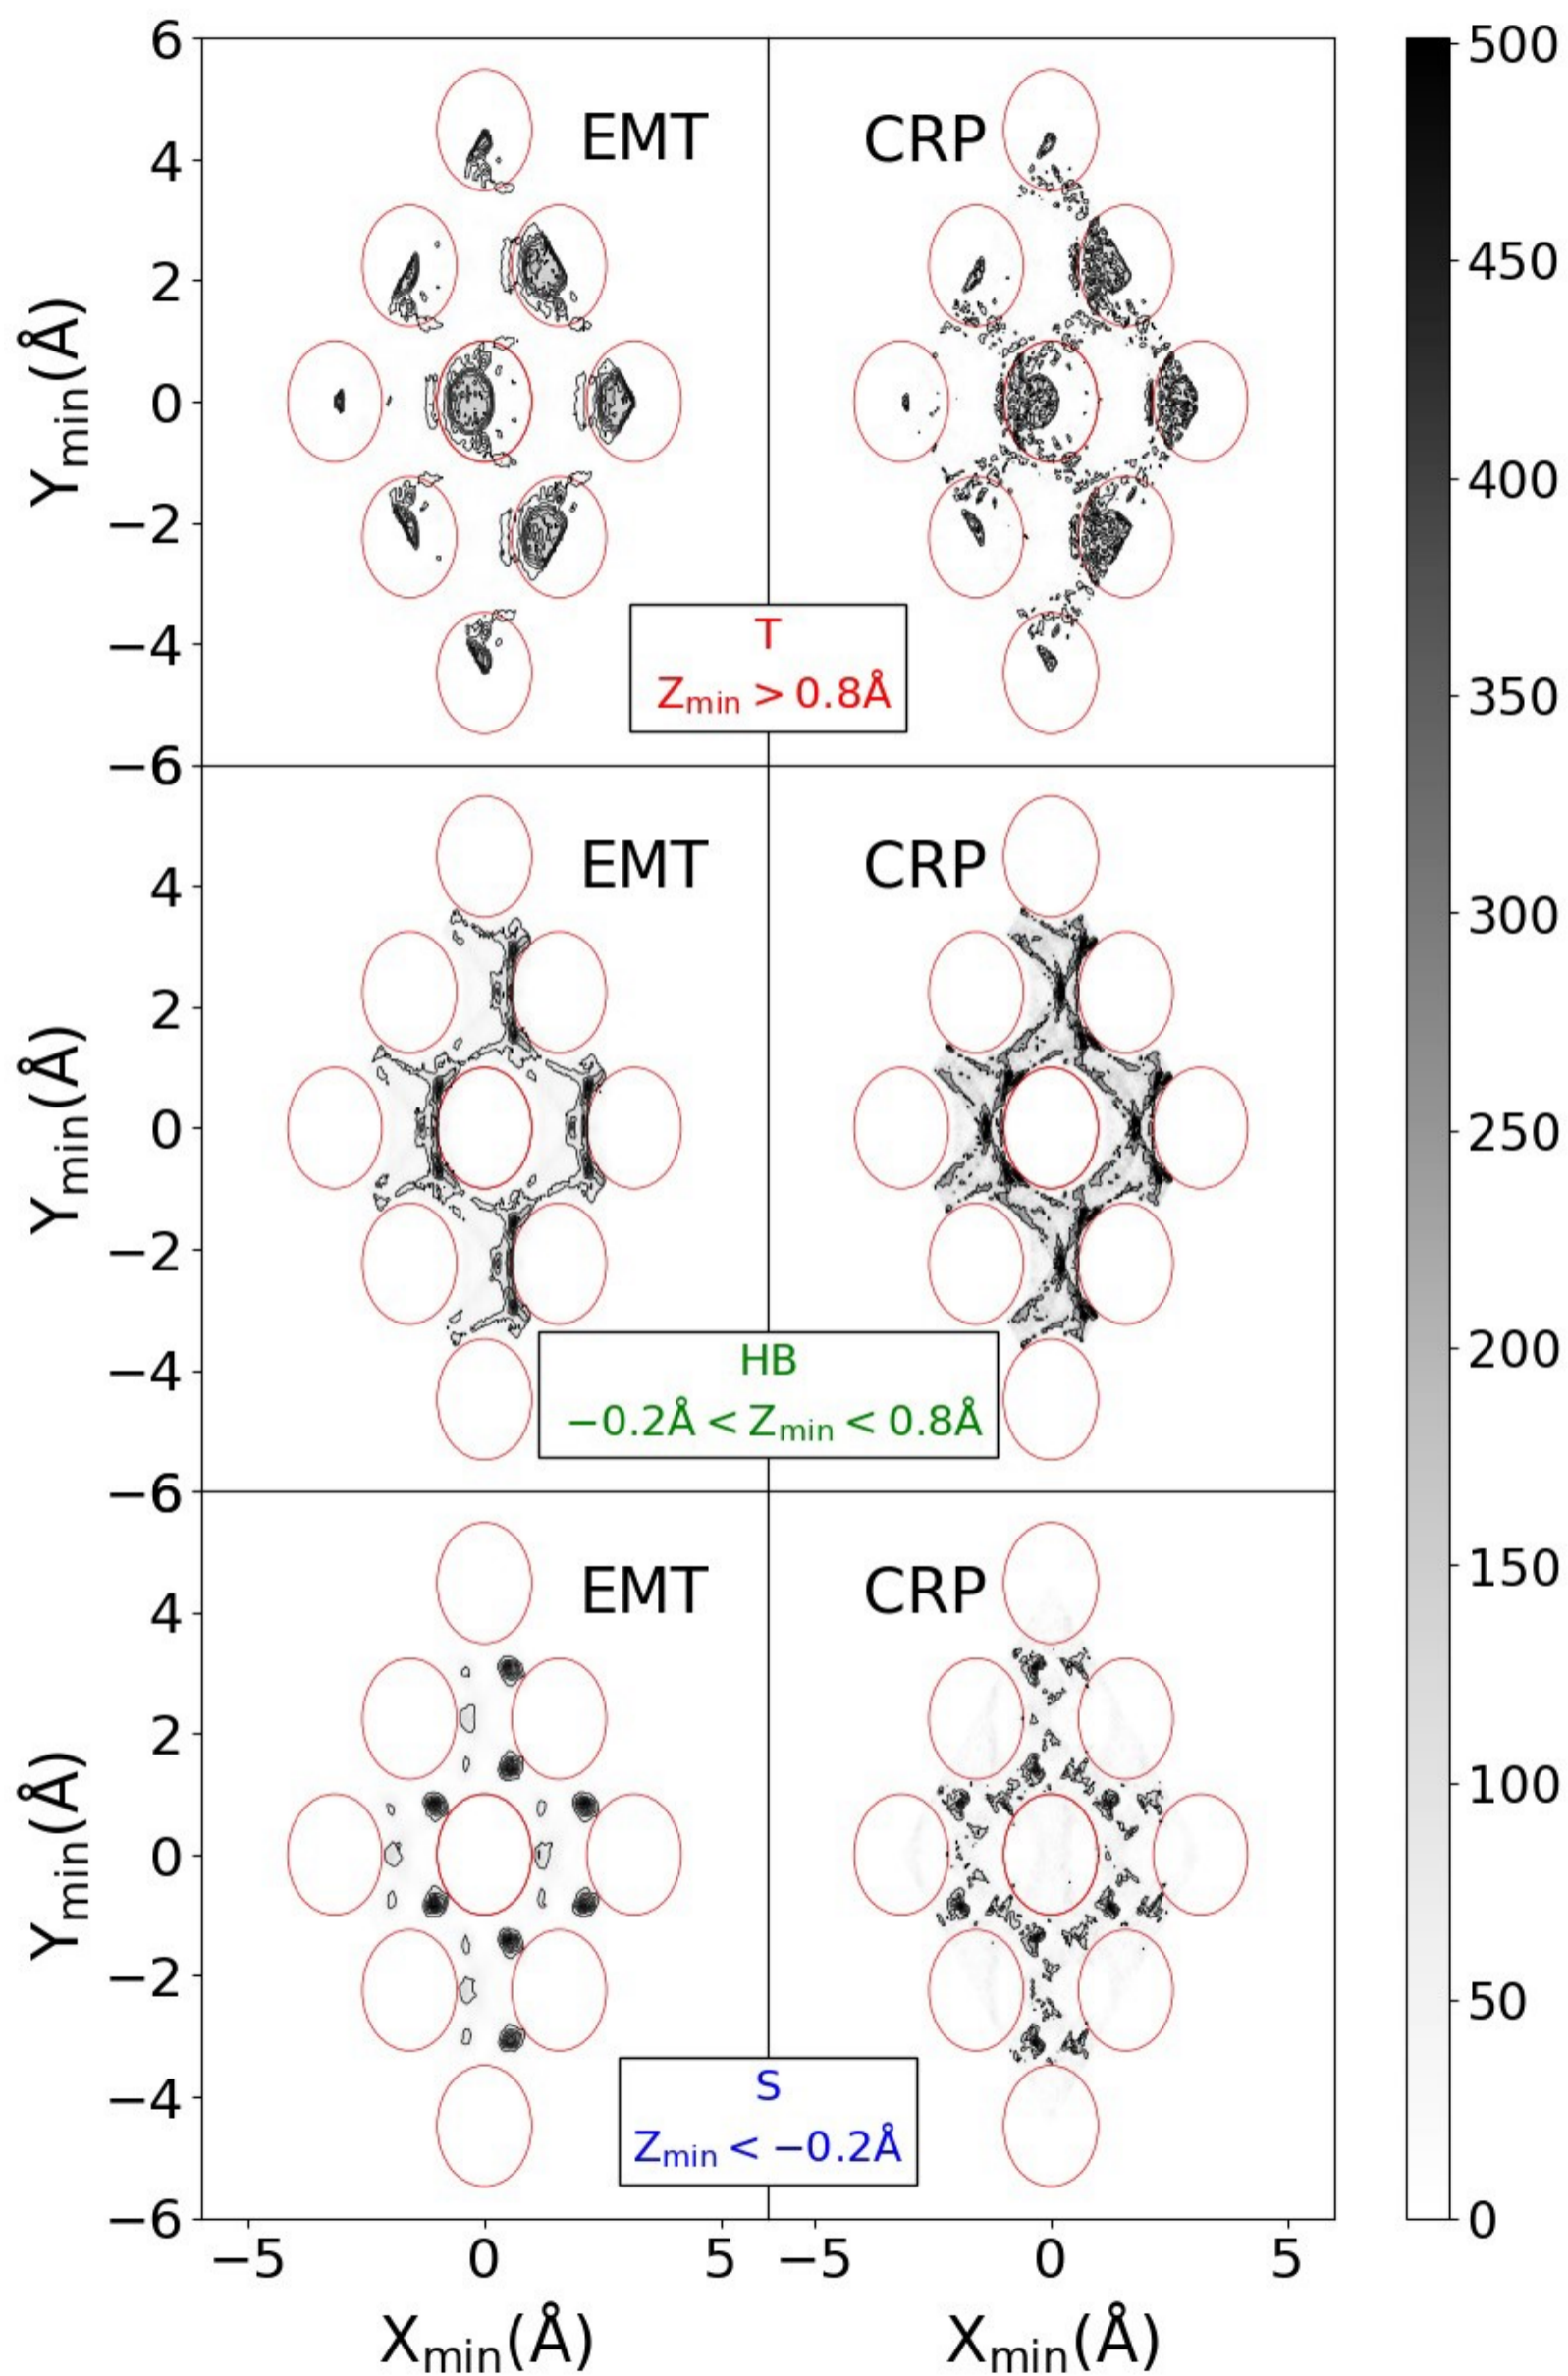

Supplement: d2cp01850k2.pdf [file d2cp01850k2.pdf]
